# Supplementary material
Source: HighWire-hosted journal article supplement (https://www.ajnr.org/highwire/filestream/52739/field_highwire_adjunct_files/0/15-01098.pdf)
Supplement: 15-01098.pdf [file 15-01098.pdf]

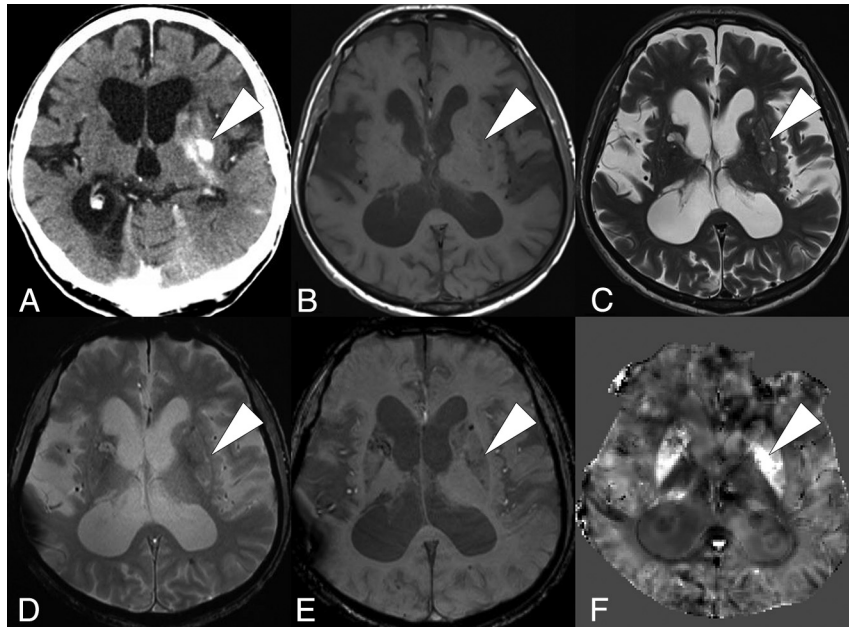

**ON-LINE FIG 1.** A 78-year-old patient with an acute stroke caused by occlusion of the left middle cerebral artery. Postinterventional axial CT (A) and MR imaging (B–F) after mechanical revascularization. On postinterventional CT obtained 1 hour after revascularization, there are hyperattenuated areas in the left lentiform nucleus (A, *arrowhead*). On MR imaging obtained 2 hours after revascularization, there is no T1 and T2 shortening but prolongation of T1 (B, *arrowhead*) and T2 (C, *arrowhead*), corresponding to the beginning of ischemic edema. The affected areas appear normal on T2\*-weighted gradient-echo (D, *arrowhead*) and susceptibility-weighted imaging (E, *arrowhead*). On the susceptibility map, there is no susceptibility shift compared with the nonischemic contralateral lentiform nucleus ( $P = .351$ , Student *t* test) (F, *arrowhead*). For the quantitative susceptibility map, the gradient-echo phase data were unwrapped within a brain mask and the field was estimated by applying a regression fit to the realigned phase in the time domain. Background contributions were removed by our in-house software, and the susceptibility distribution was finally estimated by using an algorithm based on Tikhonov and gradient regularization ( $\lambda = 0.01$ ,  $\mu = 0.015$ , 80 iterations).<sup>9,10</sup>

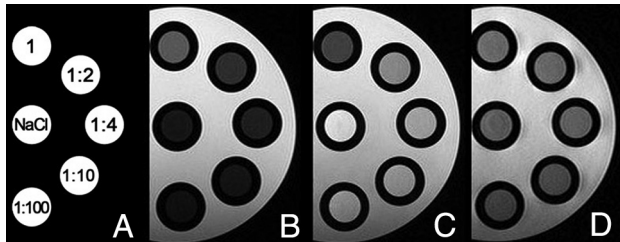

**ON-LINE-FIG 2.** Phantom model with iopamidol. Schematic illustration of the phantom (A) and actual phantom with T1-weighted SE (B), T2-weighted TSE (C), and T2\*-weighted GRE (D) MR images on a 3T scanner. Clockwise from upper to lower: pure iopamidol and iopamidol with physiologic saline solution in dilutions of 1:2, 1:4, 1:10, and 1:100. Center: physiologic saline solution. The phantom is made of acrylic glass and filled with a mixture of H<sub>2</sub>O and gadolinium-based contrast agent.

**On-line Table: Relaxation times of different concentrations of iopamidol and iopromide solutions and physiologic saline<sup>a</sup>**

|                    | T1 (ms)    |            | T2 (ms)     |            | T2* (ms)  |             |
|--------------------|------------|------------|-------------|------------|-----------|-------------|
|                    | 1.5T       | 3T         | 1.5T        | 3T         | 1.5T      | 3T          |
| iopamidol          |            |            |             |            |           |             |
| 1:1                | 317 ± 101  | 941 ± 30   | 59 ± 5      | 98 ± 6     | 53 ± 24   | 33 ± 2      |
| 1:2                | 1750 ± 151 | 1801 ± 109 | 120 ± 8     | 105 ± 6    | 80 ± 71   | 72 ± 6      |
| 1:4                | 2342 ± 223 | 2412 ± 215 | 230 ± 22    | 185 ± 10   | 110 ± 52  | 160 ± 31    |
| 1:10               | 2790 ± 288 | 2719 ± 237 | 578 ± 75    | 487 ± 31   | 188 ± 188 | 756 ± 730   |
| 1:100              | 3150 ± 431 | 3357 ± 281 | 2399 ± 1169 | 1463 ± 174 | 183 ± 284 | 2344 ± 1919 |
| Physiologic saline | 3012 ± 431 | 3264 ± 244 | 2550 ± 1182 | 2093 ± 444 | 206 ± 267 | 2652 ± 1920 |
| iopromide          |            |            |             |            |           |             |
| 1:1                | 322 ± 139  | 1261 ± 78  | 93 ± 6      | 96 ± 6     | 80 ± 57   | 35 ± 2      |
| 1:2                | 1961 ± 166 | 2161 ± 135 | 185 ± 15    | 107 ± 5    | 161 ± 132 | 75 ± 7      |
| 1:4                | 2565 ± 273 | 2805 ± 290 | 349 ± 117   | 182 ± 9    | 222 ± 79  | 162 ± 34    |
| 1:10               | 2924 ± 315 | 2876 ± 257 | 568 ± 70    | 352 ± 20   | 404 ± 362 | 454 ± 590   |
| 1:100              | 3181 ± 432 | 3277 ± 257 | 2473 ± 1126 | 1444 ± 210 | 667 ± 874 | 2369 ± 1970 |

<sup>a</sup> T2\* mapping at 3T proved difficult for the lower concentrations of the relaxation agent and for the physiologic saline because background field gradients (imperfect shimming) become important before the signal decays substantially by T2\* decay. The T2\* values for pure saline and the 1:100 dilution should, therefore, be regarded as tentative.

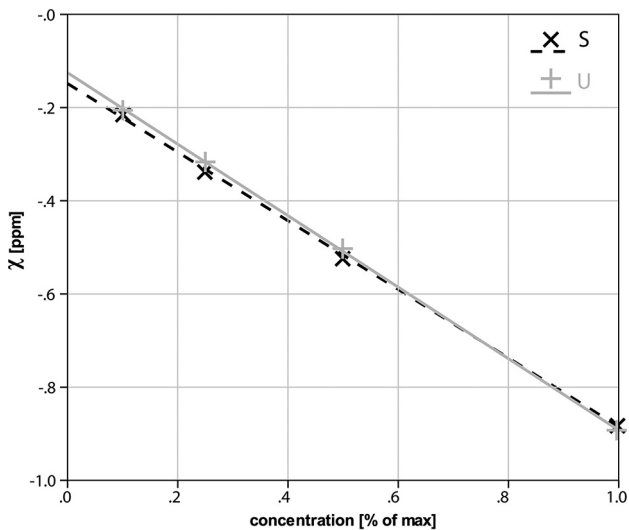

**ON-LINE-FIG 3.** Estimated susceptibility for different concentrations of iopamidol (S, dotted line) and iopromide (U, solid line). The estimated susceptibility values (in parts per million) are plotted with respect to the concentration for both contrast agents. The fitted slopes ( $-0.737$  for iopamidol and  $-0.764$  for iopromide) indicate the true susceptibility of the compounds.
